# Supplementary material for: A facile strategy for fabricating hierarchically mesoporous Co3O4 urchins and bundles and their application in Li-ion batteries with high electrochemical performance
Source: Royal Society of Chemistry journal article supplement (doi:10.1039/c4ra16871b), 2015-01-01
Supplement: c4ra16871b1.pdf [file c4ra16871b1.pdf]

## A facile strategy for fabricating hierarchically mesoporous $\text{Co}_3\text{O}_4$ urchins and bundles and their application in Li-ion batteries with high electrochemical performance

Tao Yang, Qian Yang, Yangai Liu\*, Zhaohui Huang\*, Xiaowen Wu, Ming Guan, Minghao Fang

School of Materials Science and Technology, Beijing Key Laboratory of Materials Utilization of Nonmetallic Minerals and Solid Wastes, National Laboratory of Mineral Materials, China University of Geosciences (Beijing) 100083, P.R. China.

### Supporting Information

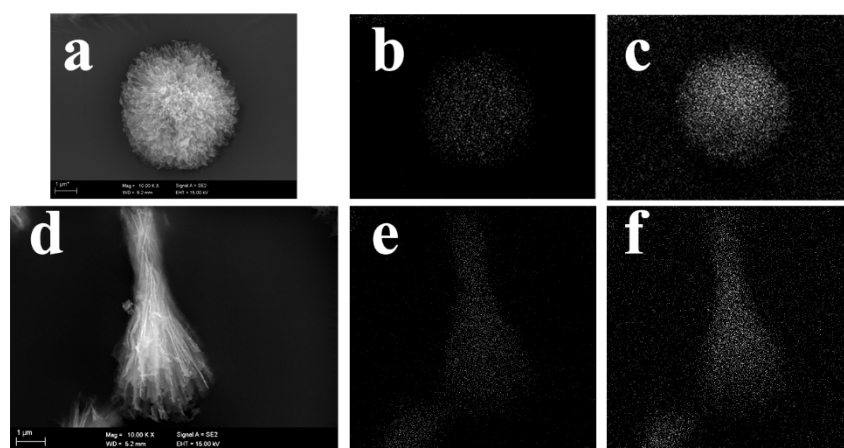

Figure S1 SEM images (a, d) and corresponding EDX element mappings of Co (b, e) and O (c, f) for the hierarchically porous  $\text{Co}_3\text{O}_4$  urchins and bundles

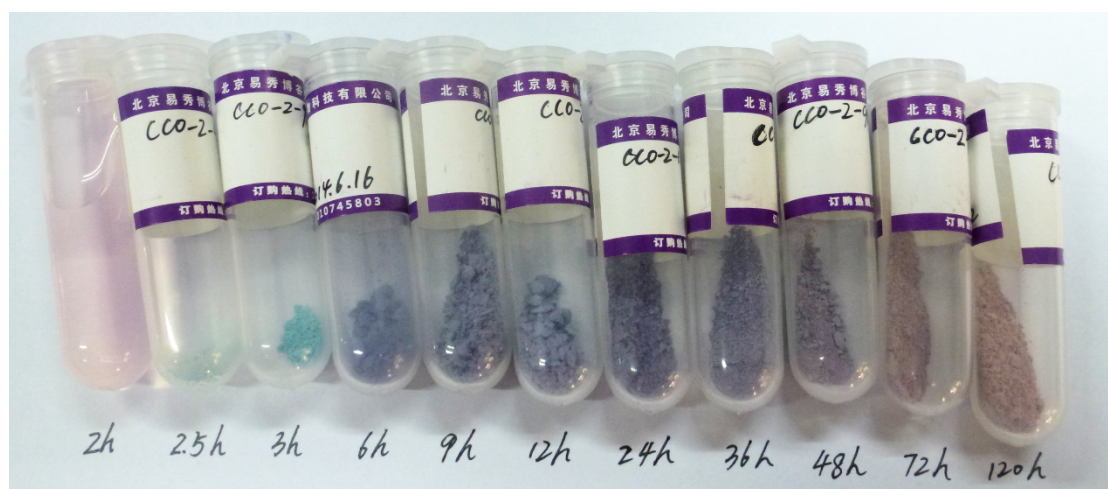

Figure S2 The macrograph of the as-obtained precursors with different times by hydrothermal method

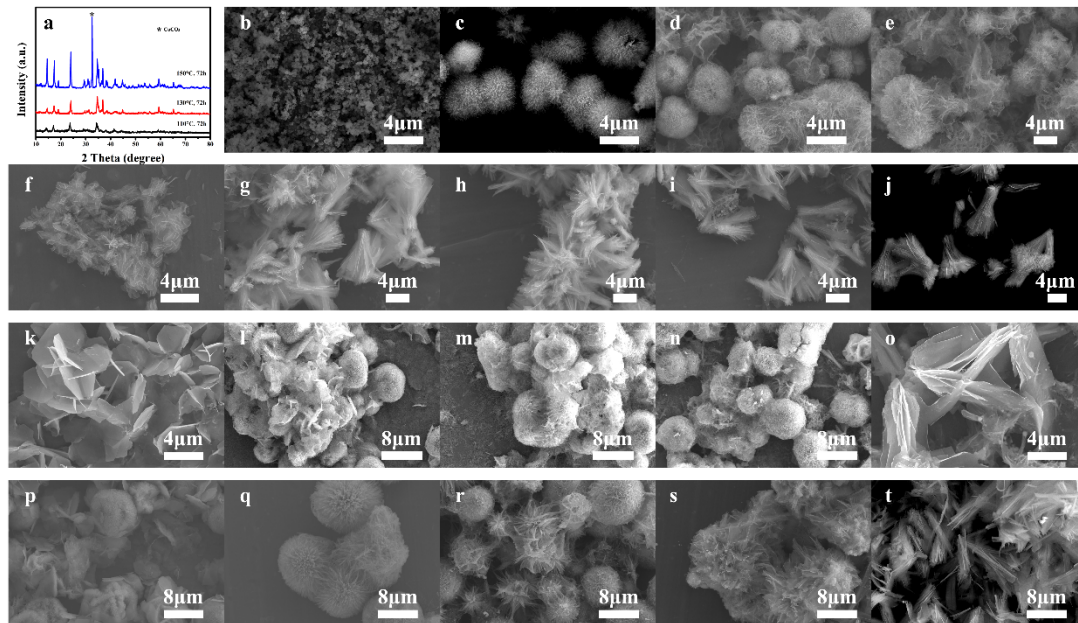

Figure S3 SEM images of the as-obtained precursor at different temperature: 110 °C (b: 1 h; c: 3 h; d: 6 h; e: 9 h; f: 12 h; g: 24 h; h: 48 h; i: 72 h; j: 120 h); 130 °C (k: 1 h; l: 2 h; m: 6 h; n: 24 h; o: 72 h); 150 °C (p: 1 h; q: 3 h; r: 9 h; s: 24 h; t: 72 h)
